# Supplementary material for: Temperature sensing and optical heating in Er3+single-doped and Er3+/Yb3+codoped NaY(WO4)2particles
Source: Royal Society of Chemistry journal article supplement (doi:10.1039/c4ra05492j), 2014-08-26
Supplement: c4ra05492j1.pdf [file c4ra05492j1.pdf]

## Electronic Supplementary Information

### Morphology- and concentration-dependent temperature sensing and optical heating in $\text{Er}^{3+}$ single-doped and $\text{Er}^{3+}/\text{Yb}^{3+}$ co-doped $\text{NaY}(\text{WO}_4)_2$ particles derived from microwave assisted hydrothermal reaction

Hui Zheng<sup>a,b</sup>, Baojiu Chen<sup>\*a</sup>, Hongquan Yu<sup>#b</sup>, Jinsu Zhang<sup>a</sup>, Jiashi Sun<sup>a</sup>, Xiangping Li<sup>a</sup>, Min Sun<sup>a</sup>,

Bining Tian<sup>a</sup>, Hua Zhong<sup>a</sup>, Shaobo Fu<sup>a</sup>, Ruinian Hua<sup>c</sup> and Haiping Xia<sup>d</sup>

<sup>a</sup> Department of Physics, Dalian Maritime University, Dalian 116026, People's Republic of China. Email: [chenmbj@sohu.com](mailto:chenmbj@sohu.com)

<sup>b</sup> College of Environmental and Chemical Engineering, Dalian Jiaotong University, Dalian 116028, People's Republic of China.

Email: [yuhq7808@djtu.edu.cn](mailto:yuhq7808@djtu.edu.cn)

<sup>c</sup> School of Physics and Material Engineering, College of Life Science, Dalian Nationalities University, Dalian 116600, People's Republic of China

<sup>d</sup> Key laboratory of Photo-electronic Materials, Ningbo University, Ningbo, 315211, People's Republic of China

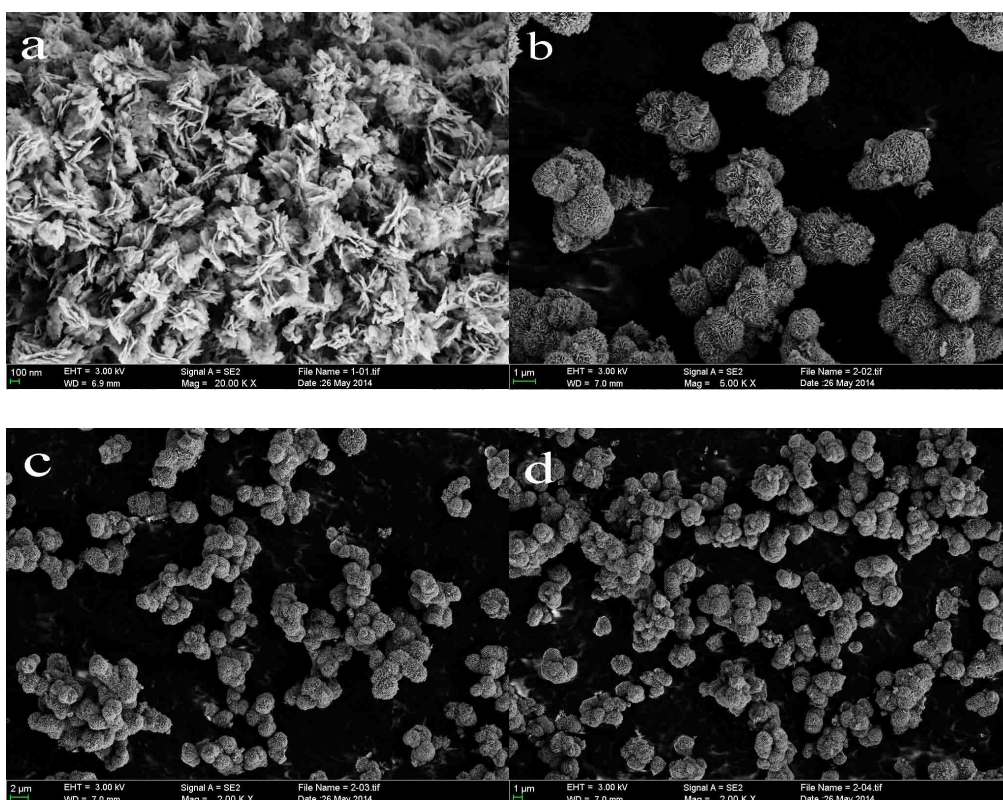

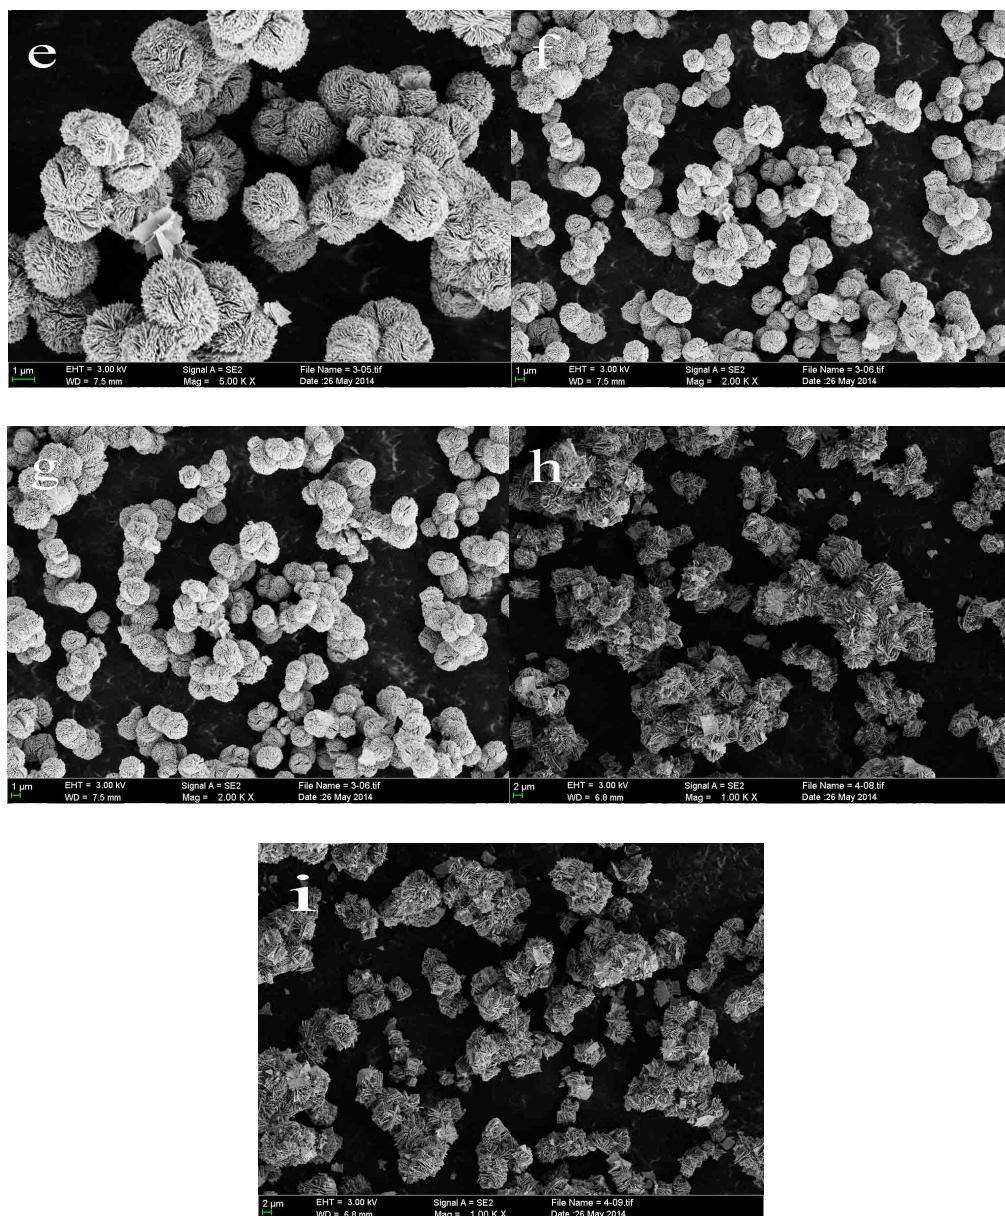

**Figure. S1** FE-SEM images of samples with different morphologies. The ratio of  $\text{Cit}^{3-}/\text{Y}^{3+}$  is (a) 0.5, (b) (c) (d) 1, (e) (f) (g) 1.5 and (h) (i) 2.

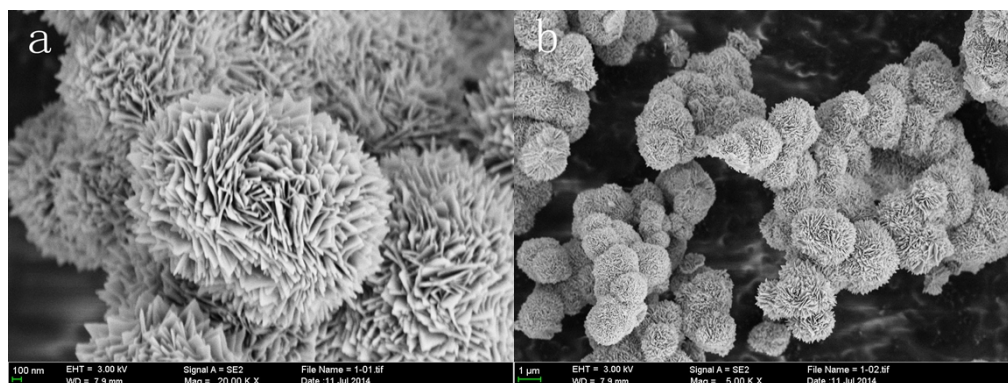



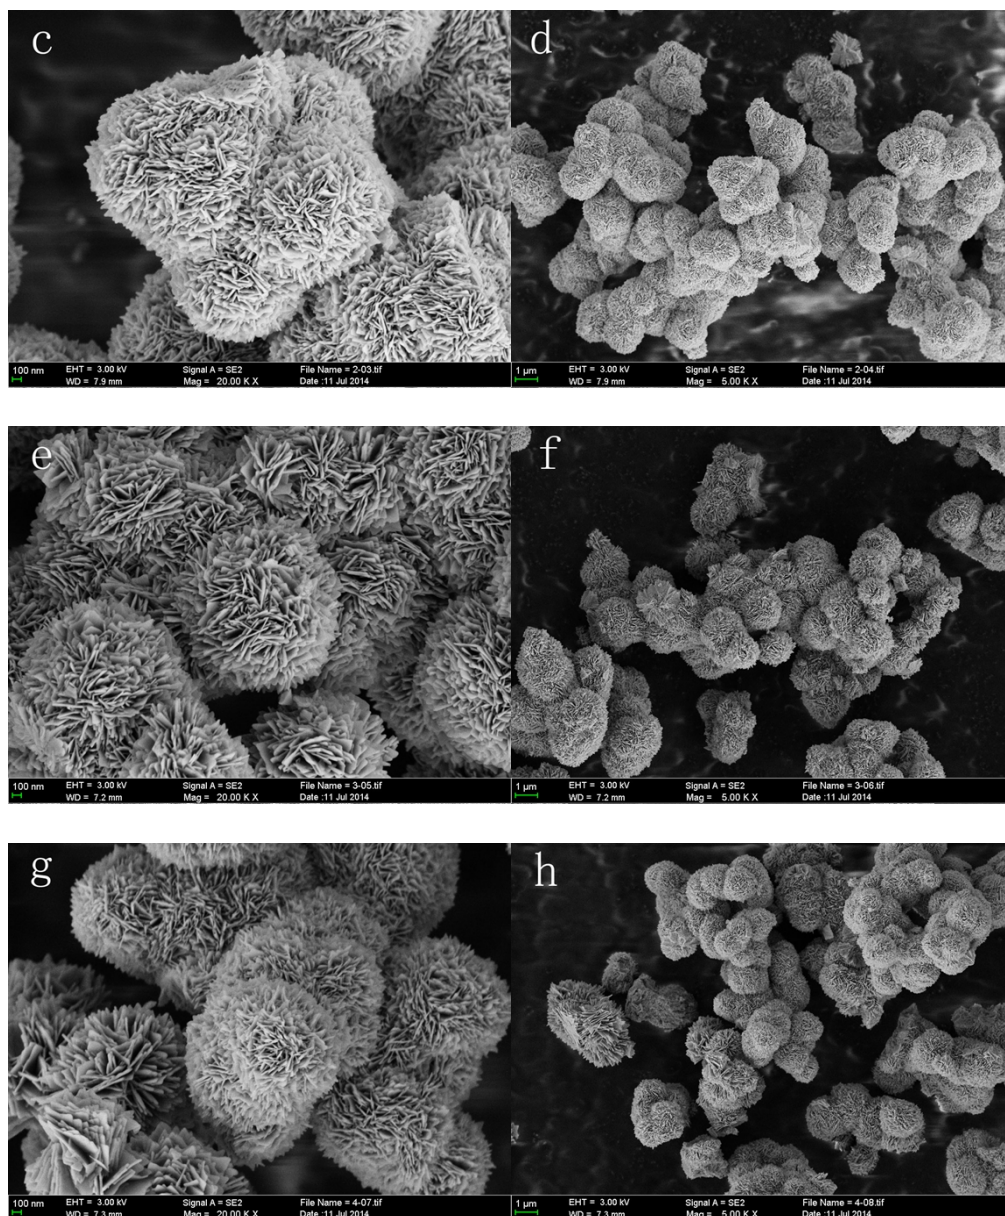

**Figure. S2** FE-SEM images of  $\text{Er}^{3+}$  single-doped and  $\text{Er}^{3+}/\text{Yb}^{3+}$  co-doped  $\text{NaY(WO}_4)_2$  samples: (a), (b)  $\text{NaY(WO}_4)_2: 2.5\%\text{Er}^{3+}$ , (c), (d)  $\text{NaY(WO}_4)_2: 10\%\text{Er}^{3+}$ , (e), (f)  $\text{NaY(WO}_4)_2: 1\%\text{Er}^{3+}/2.5\%\text{Yb}^{3+}$ , (g), (h)  $1\%\text{Er}^{3+}/10\%\text{Yb}^{3+}$   $\text{NaY(WO}_4)_2: 1\%\text{Er}^{3+}/10\%\text{Yb}^{3+}$
